# Supplementary material for: Acetylated pelargonidin-3-O-glucoside alleviates hepatocyte lipid deposition through activating the AMPK-mediated lysosome-autophagy pathway and redox state
Source: Royal Society of Chemistry journal article supplement (doi:10.1039/d4fo00185k), 2024-01-01

## Supplementary Information

### **Acetylated pelargonidin-3-*O*-glucoside alleviates hepatocyte lipid deposition through activating the AMPK-mediated lysosome-autophagy pathway and redox state**

Lianghua Xie<sup>a,b,1</sup>, Xin Hao<sup>b,1</sup>, Jiahong Xie<sup>b</sup>, Jianling Mo<sup>a</sup>, Changzheng Yuan<sup>c\*</sup>, Wei Chen<sup>a,b\*</sup>

<sup>a</sup> Department of Traditional Chinese Medicine, Sir Run Run Shaw Hospital, School of Medicine, Zhejiang University, Hangzhou, 310016, China

<sup>b</sup> Department of Food Science and Nutrition, College of Biosystems Engineering and Food Science, Zhejiang University, Hangzhou, 310058, China

<sup>c</sup> School of Public Health, Zhejiang University School of Medicine, Hangzhou, 310058, China

<sup>1</sup> These authors contributed equally to this work.

#### **\* Corresponding author:**

Prof. Wei Chen, Department of Food Science and Nutrition, College of Biosystems Engineering and Food Science, Zhejiang University, Hangzhou, 310058, China. E-mail: [zjuchenwei@zju.edu.cn](mailto:zjuchenwei@zju.edu.cn)

Prof. Changzheng Yuan, School of Public Health, Zhejiang University School of Medicine, Hangzhou, 310058, China. E-mail: [chy478@zju.edu.cn](mailto:chy478@zju.edu.cn)

1. The raw pictures of Western blot results in Figure 3C

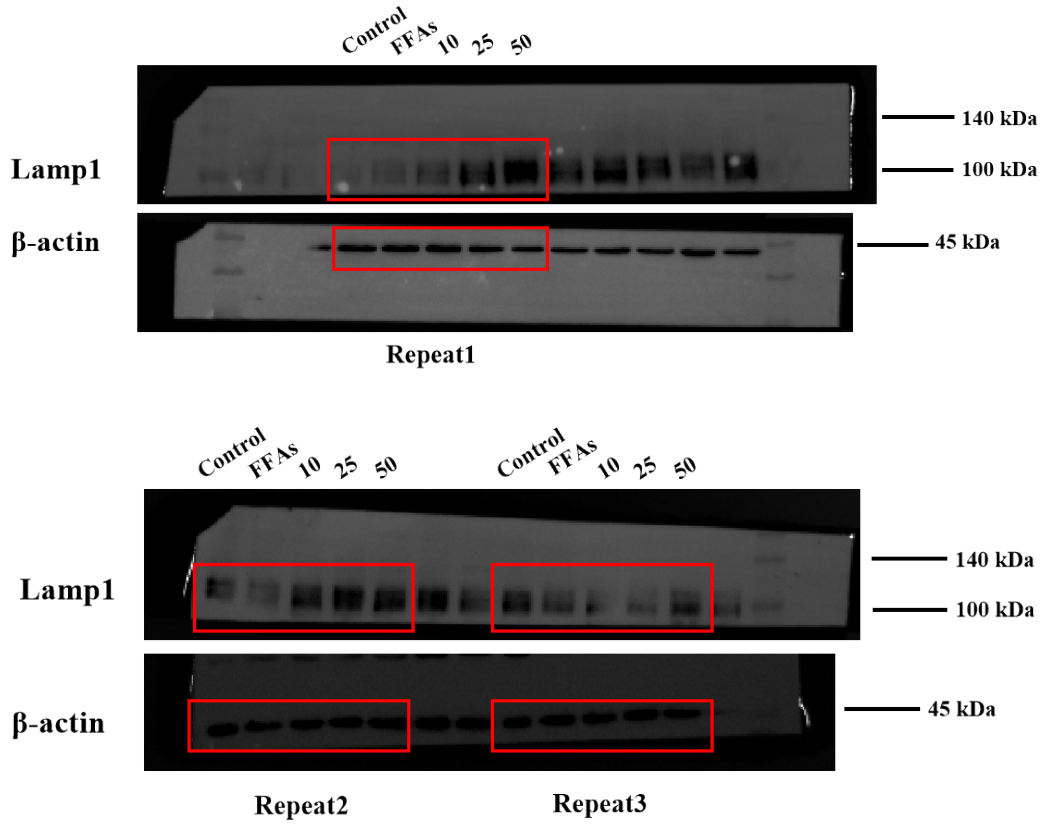

## 2. The raw pictures of Western blot results in Figure 3E

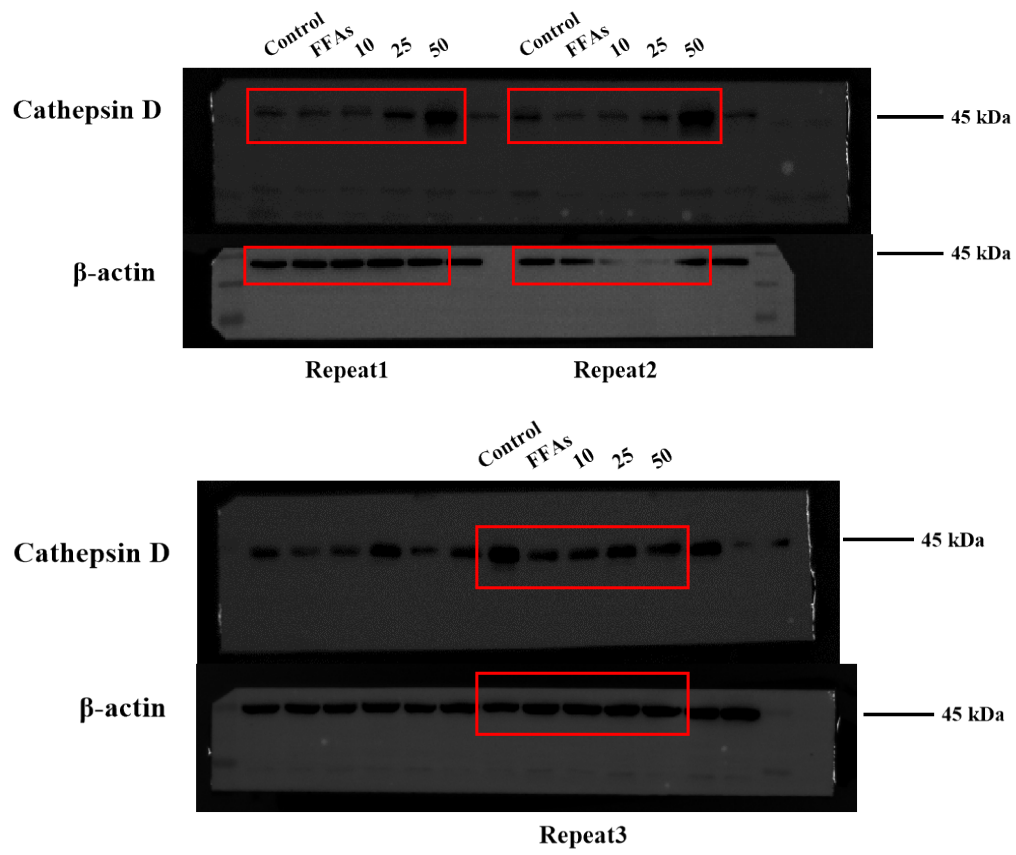

### 3. The raw pictures of Western blot results in Figure 4A

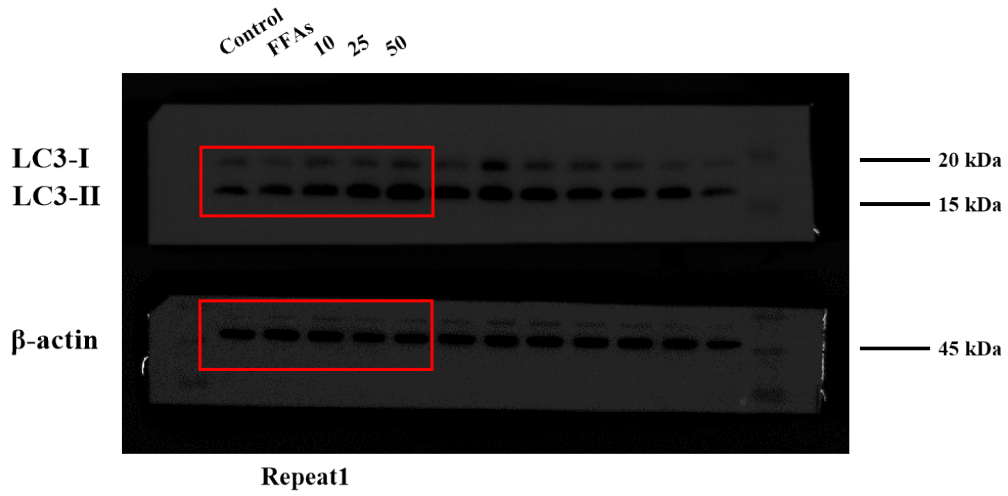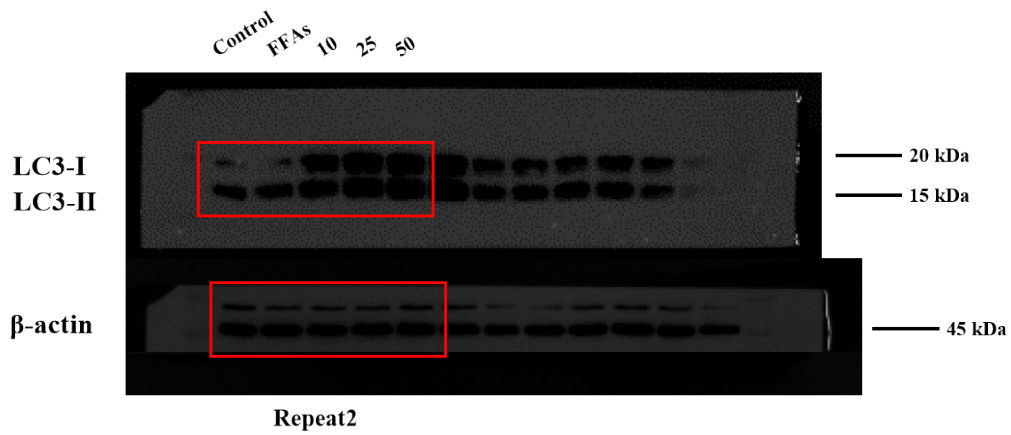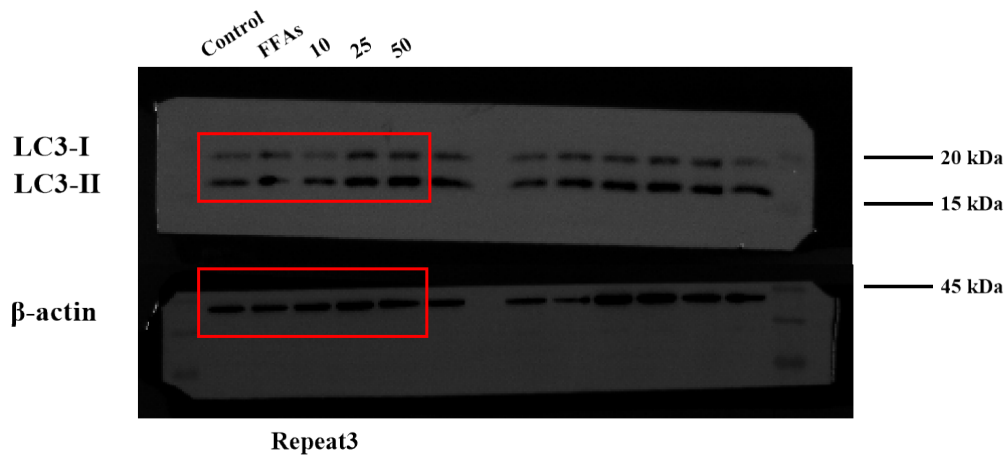

#### 4. The raw pictures of Western blot results in Figure 4D

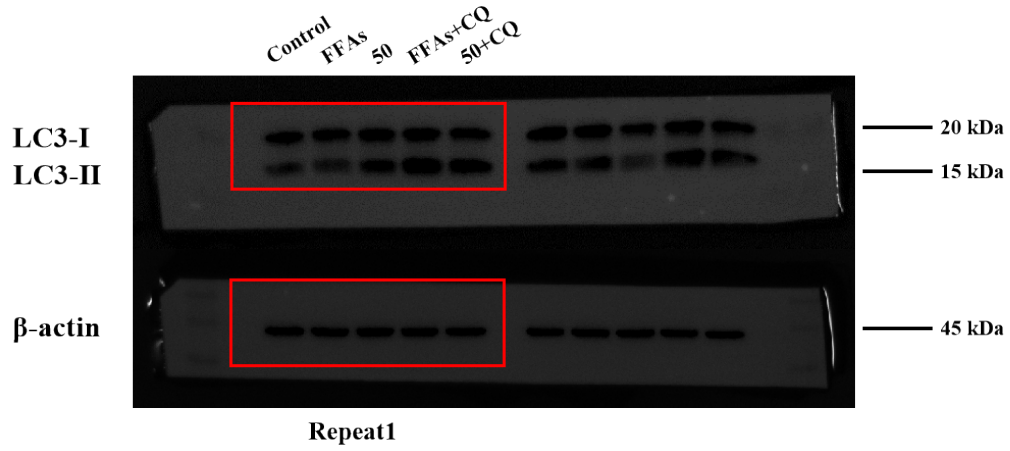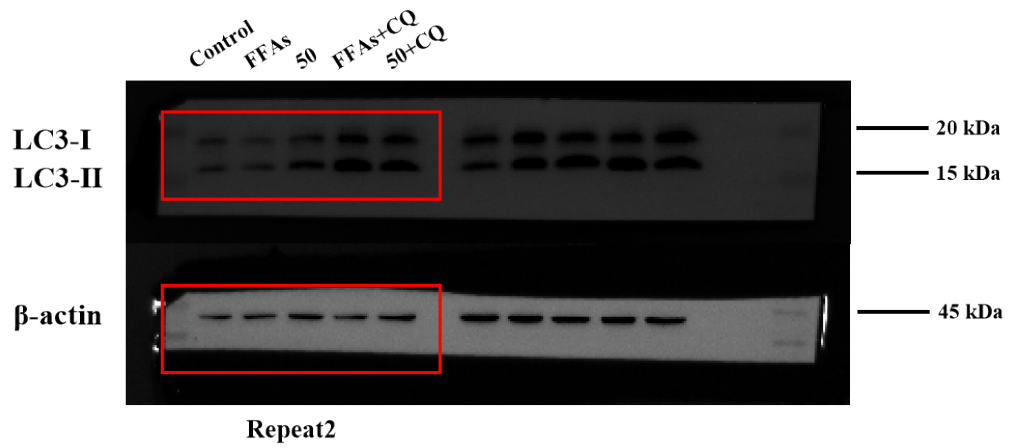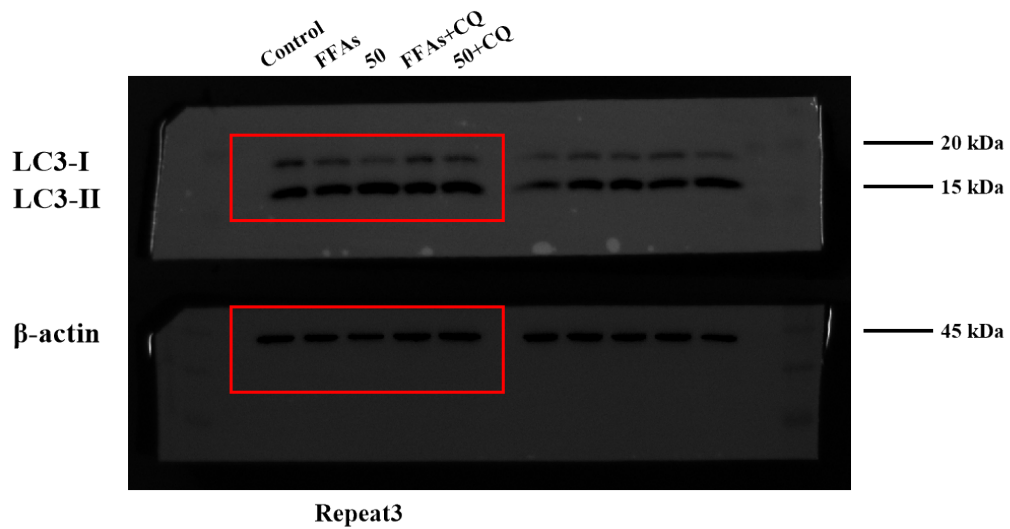

5. The raw pictures of Western blot results in Figure 5A

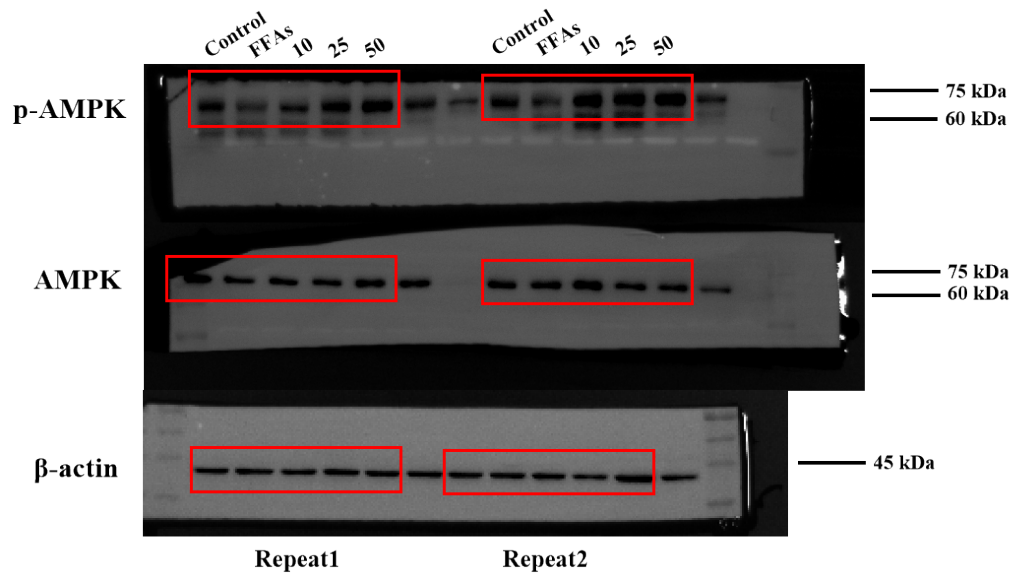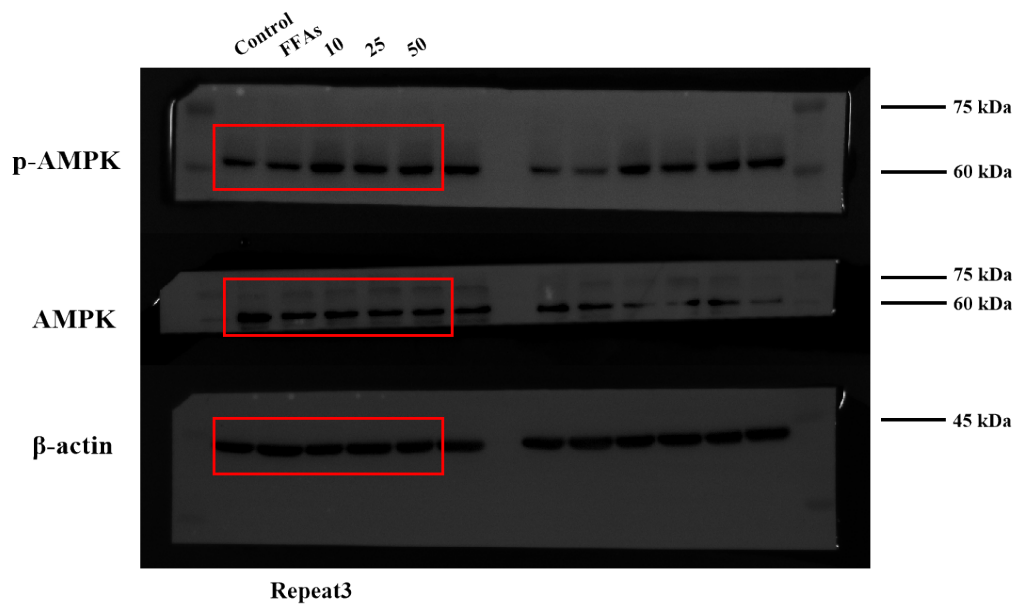

Supplement: d4fo00185k1.pdf [file d4fo00185k1.pdf]
